# Supplementary material for: Influences of human activity and climate change on growing-season soil moisture in the Qinghai–Tibet grasslands from 2000 to 2020
Source: Frontiers journal article supplement (doi:10.3389/fevo.2023.1264870), 2023-11-01
Supplement: Data_Sheet_1.pdf [file Data_Sheet_1.pdf]

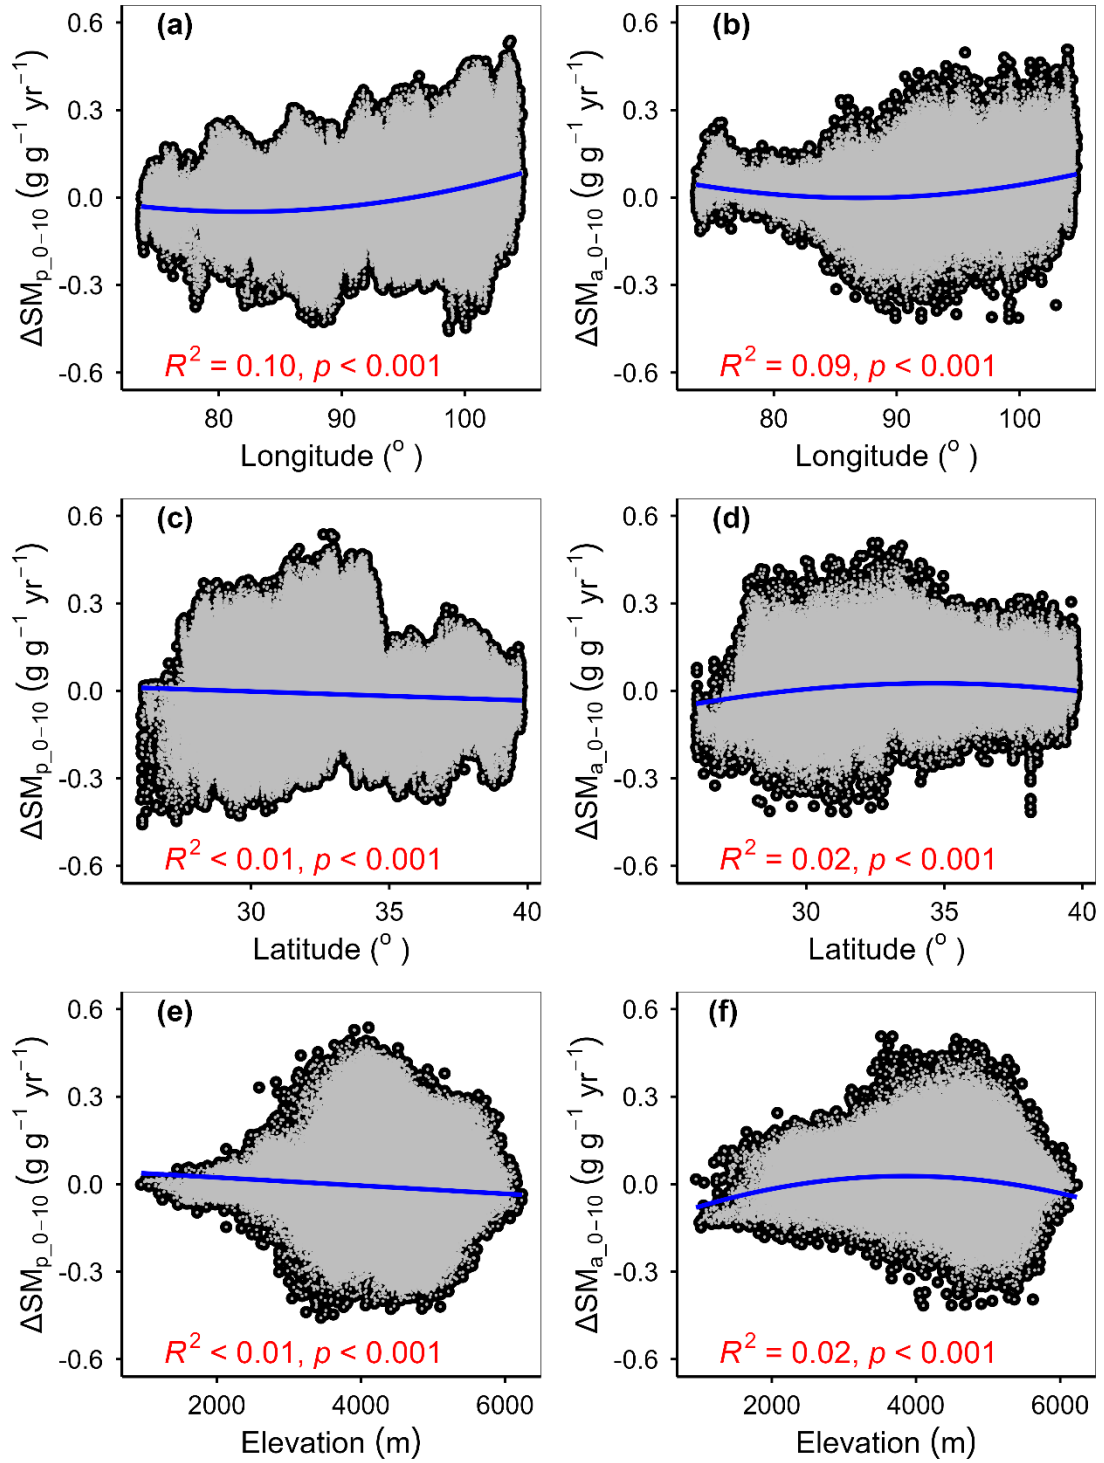

**Figure S1** Relationships between (a)  $\Delta SM_{p\_0-10}$  and longitude, (b)  $\Delta SM_{a\_0-10}$  and longitude, (c)  $\Delta SM_{p\_0-10}$  and latitude, (d)  $\Delta SM_{a\_0-10}$  and latitude, (e)  $\Delta SM_{p\_0-10}$  and elevation, and (f)  $\Delta SM_{a\_0-10}$  and elevation.

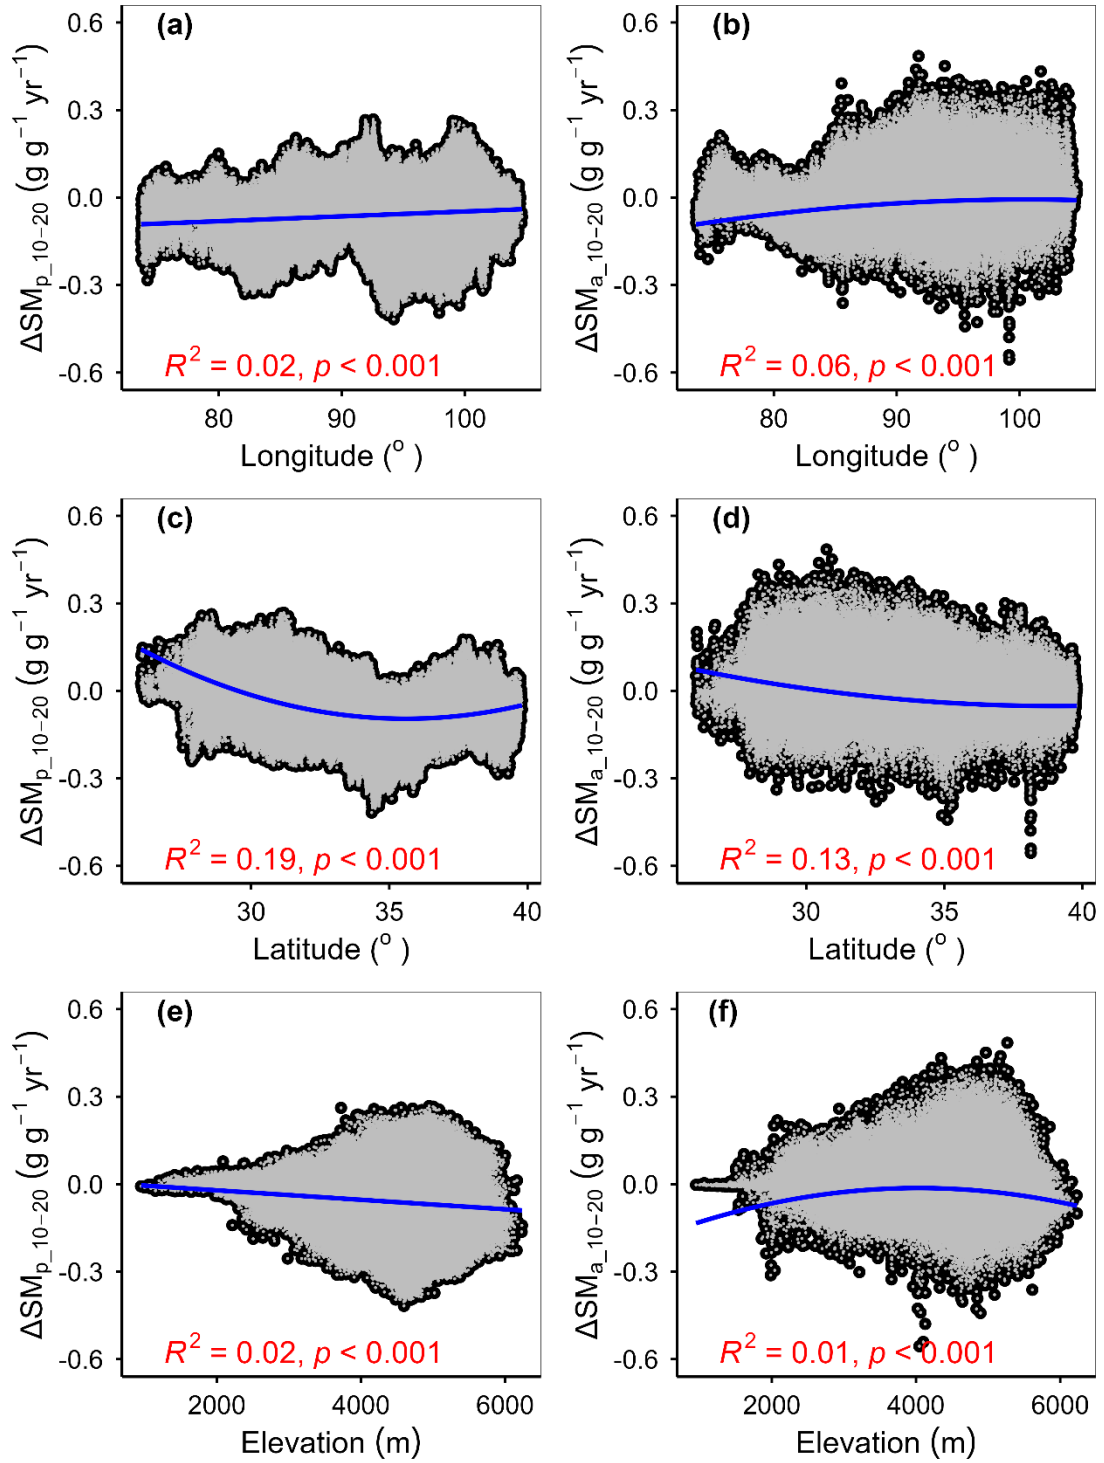

**Figure S2** Relationships between (a)  $\Delta SM_{p_{10-20}}$  and longitude, (b)  $\Delta SM_{a_{10-20}}$  and longitude, (c)  $\Delta SM_{p_{10-20}}$  and latitude, (d)  $\Delta SM_{a_{10-20}}$  and latitude, (e)  $\Delta SM_{p_{10-20}}$  and elevation, and (f)  $\Delta SM_{a_{10-20}}$  and elevation.

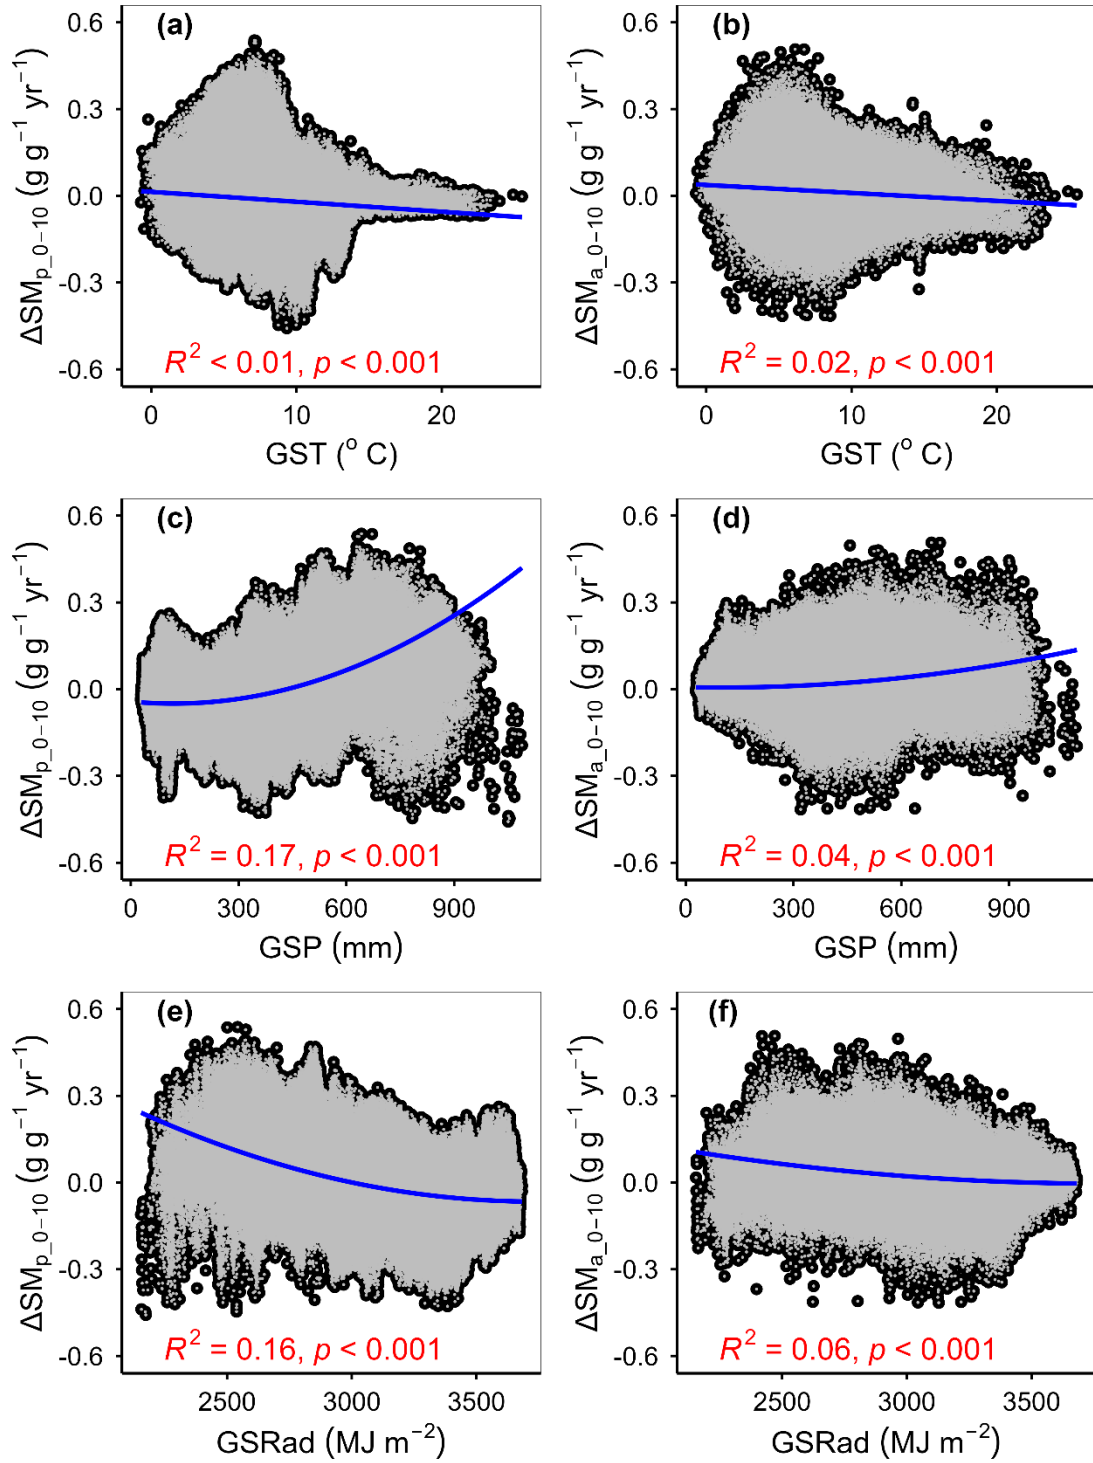

**Figure S3** Relationships between (a)  $\Delta SM_{p_{0-10}}$  and GST, (b)  $\Delta SM_{a_{0-10}}$  and GST, (c)  $\Delta SM_{p_{0-10}}$  and GSP, (d)  $\Delta SM_{a_{0-10}}$  and GSP, (e)  $\Delta SM_{p_{0-10}}$  and GSRad, and (f)  $\Delta SM_{a_{0-10}}$  and GSRad.

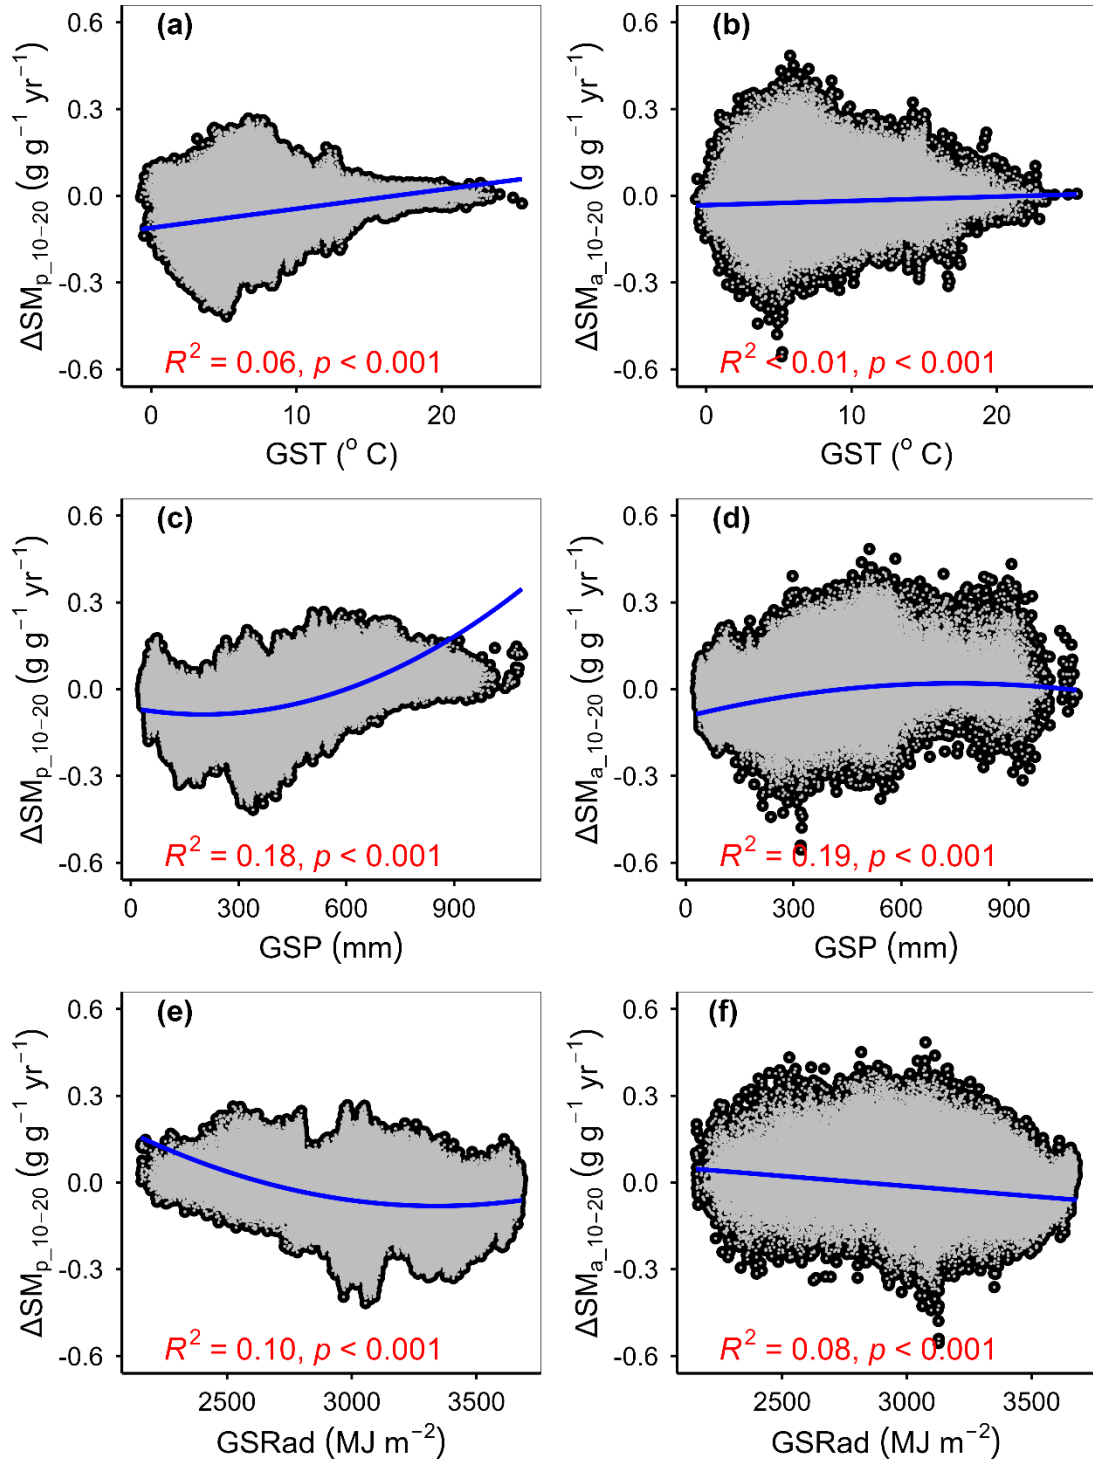

**Figure S4** Relationships between (a)  $\Delta SM_{p_{10-20}}$  and GST, (b)  $\Delta SM_{a_{10-20}}$  and GST, (c)  $\Delta SM_{p_{10-20}}$  and GSP, (d)  $\Delta SM_{a_{10-20}}$  and GSP, (e)  $\Delta SM_{p_{10-20}}$  and GSRad, and (f)  $\Delta SM_{a_{10-20}}$  and GSRad.

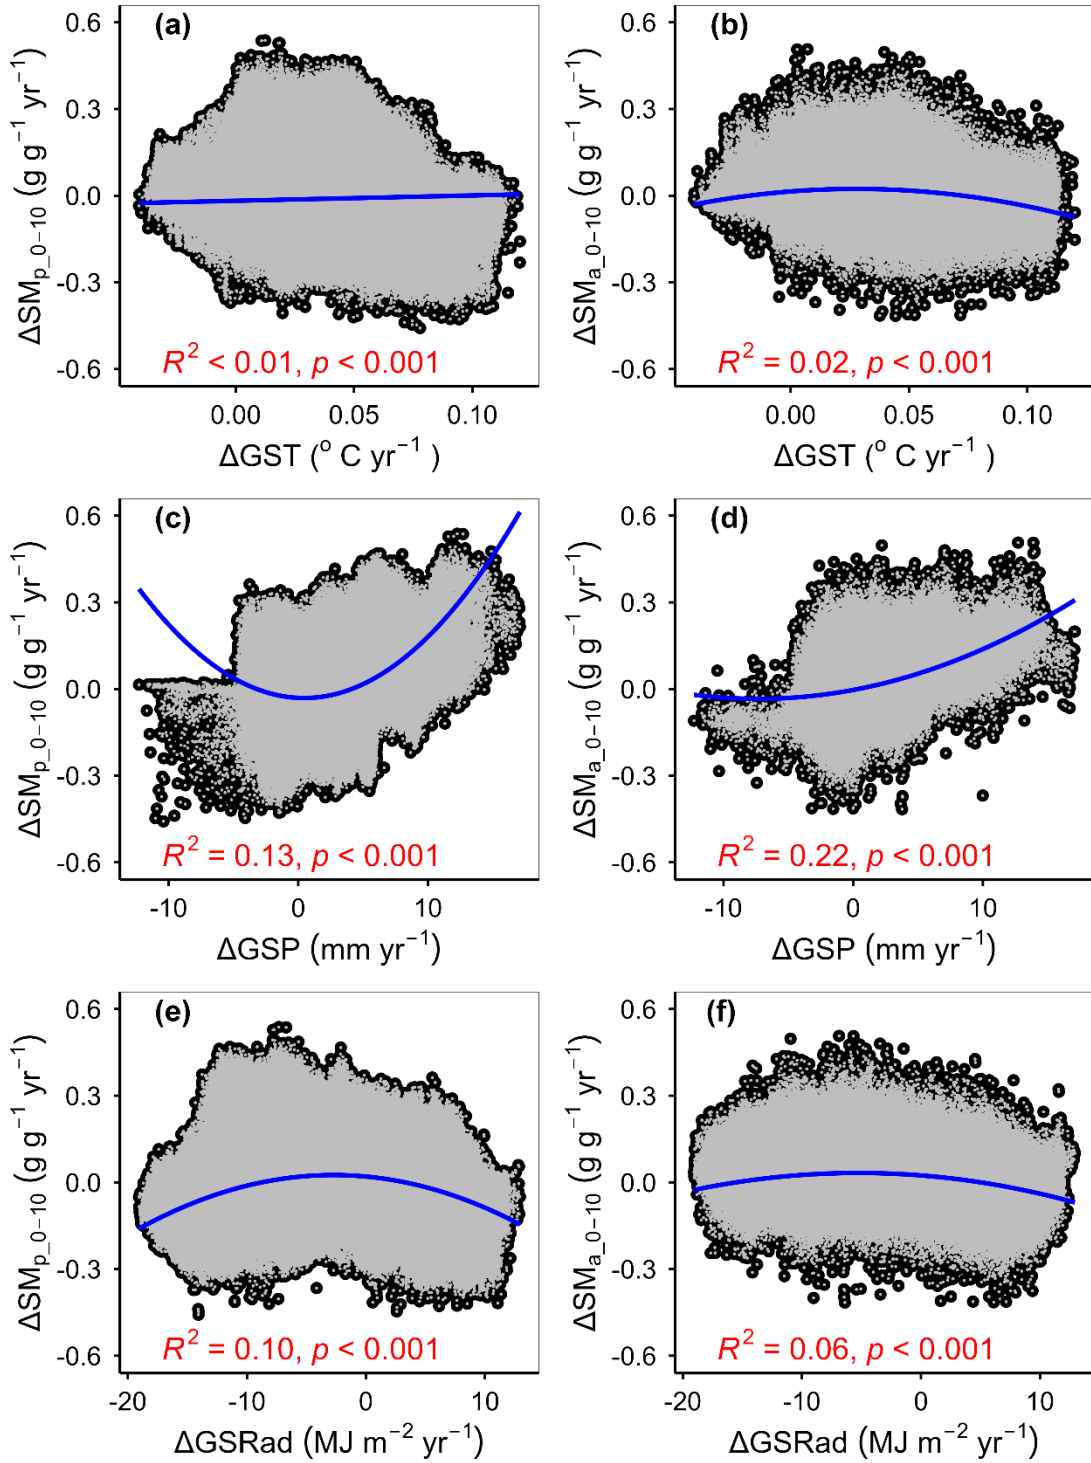

**Figure S5** Relationships between (a)  $\Delta SM_{p\_0-10}$  and  $\Delta GST$ , (b)  $\Delta SM_{a\_0-10}$  and  $\Delta GST$ , (c)  $\Delta SM_{p\_0-10}$  and  $\Delta GSP$ , (d)  $\Delta SM_{a\_0-10}$  and  $\Delta GSP$ , (e)  $\Delta SM_{p\_0-10}$  and  $\Delta GSRad$ , and (f)  $\Delta SM_{a\_0-10}$  and  $\Delta GSRad$ .

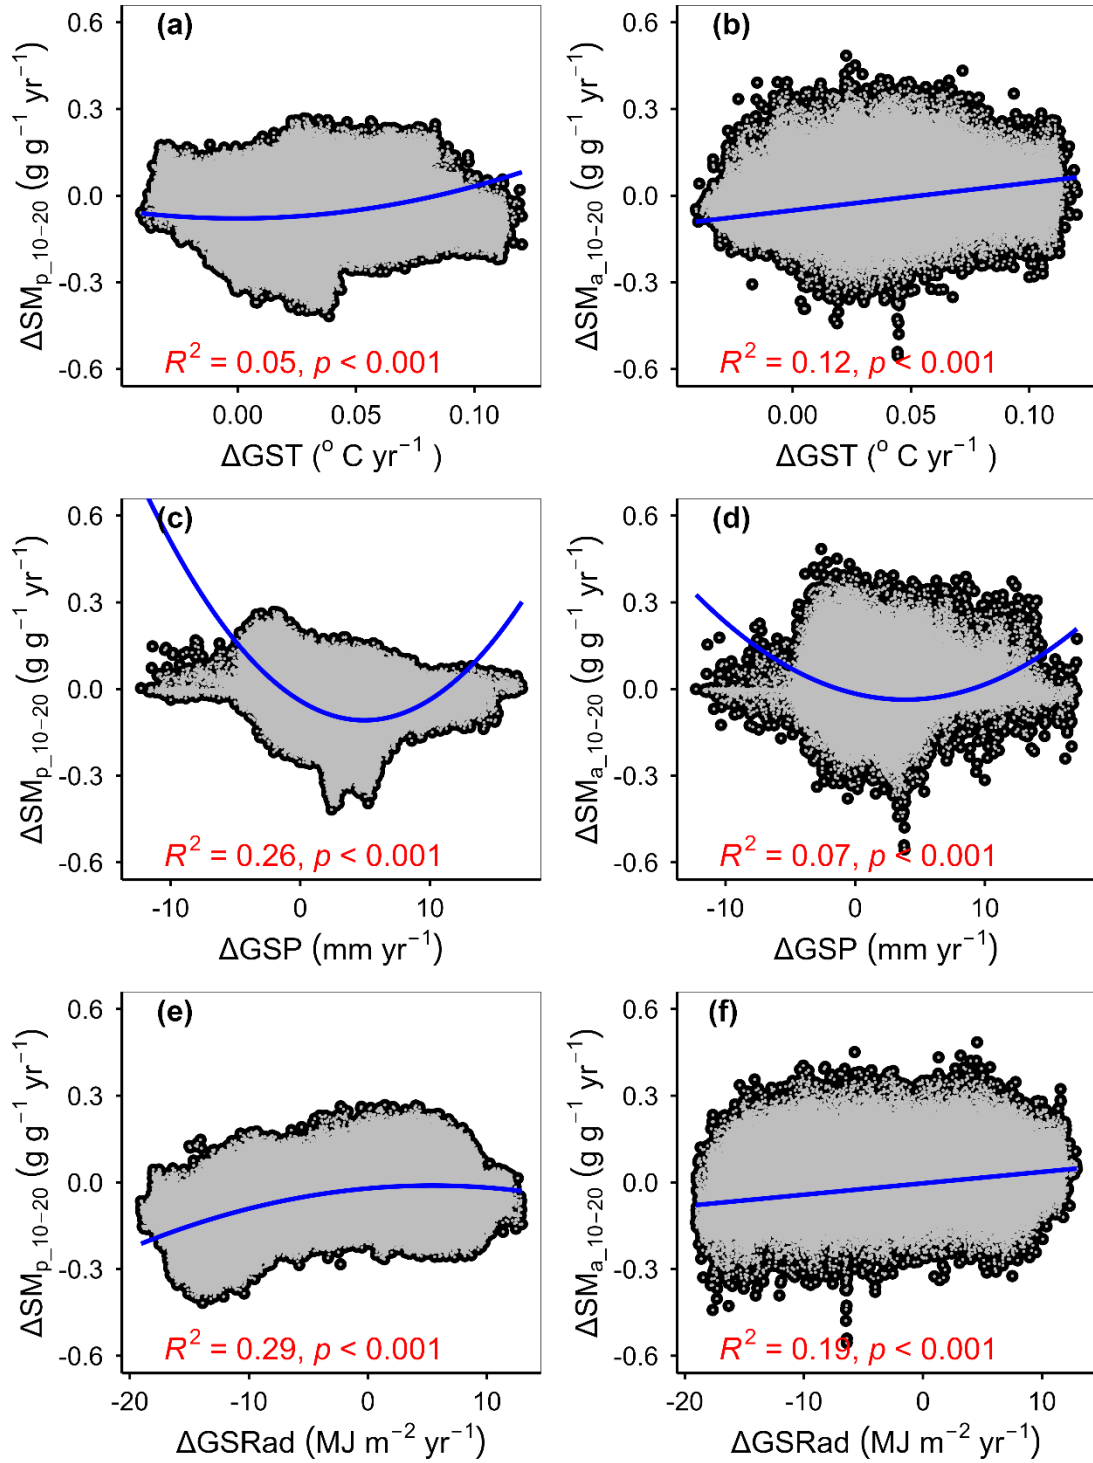

**Figure S6** Relationships between (a)  $\Delta SM_{p_{10-20}}$  and  $\Delta GST$ , (b)  $\Delta SM_{a_{10-20}}$  and  $\Delta GST$ , (c)  $\Delta SM_{p_{10-20}}$  and  $\Delta GSP$ , (d)  $\Delta SM_{a_{10-20}}$  and  $\Delta GSP$ , (e)  $\Delta SM_{p_{10-20}}$  and  $\Delta GSRad$ , and (f)  $\Delta SM_{a_{10-20}}$  and  $\Delta GSRad$ .



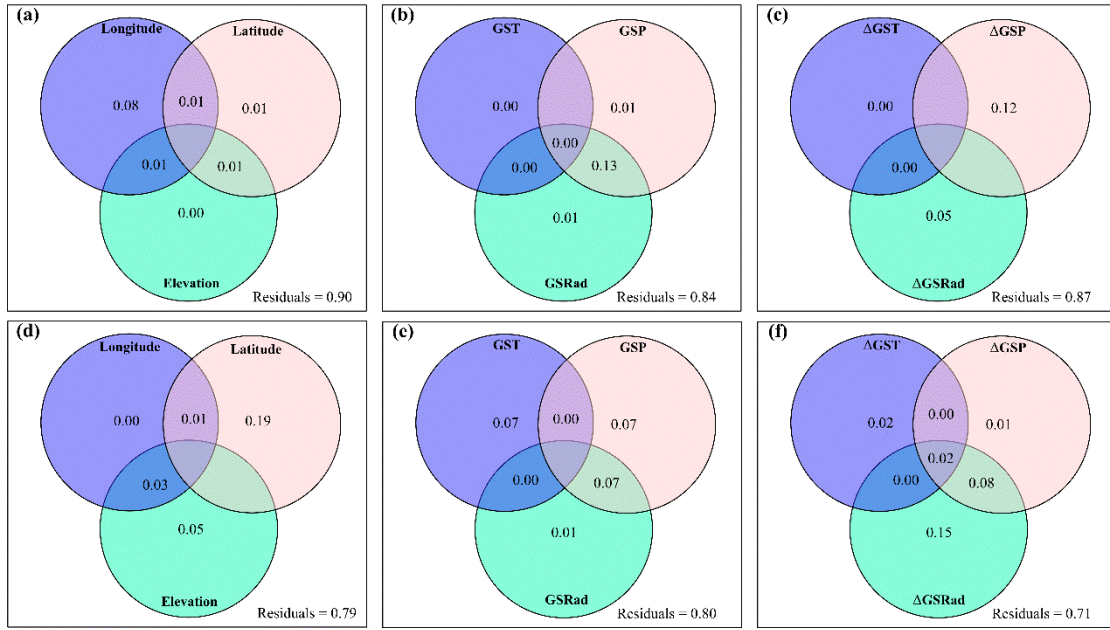

**Figure S7** Relative influences of (a) elevation, latitude and longitude to  $\Delta SM_{p\_0-10}$ , (b) GST, GSP and GSRad to  $\Delta SM_{p\_0-10}$ , (c)  $\Delta GST$ ,  $\Delta GSP$  and  $\Delta GSRad$  to  $\Delta SM_{p\_0-10}$ , (d) elevation, latitude and longitude to  $\Delta SM_{p\_10-20}$ , (e) GST, GSP and GSRad to  $\Delta SM_{p\_10-20}$ , and (f)  $\Delta GST$ ,  $\Delta GSP$  and  $\Delta GSRad$  to  $\Delta SM_{p\_10-20}$ .

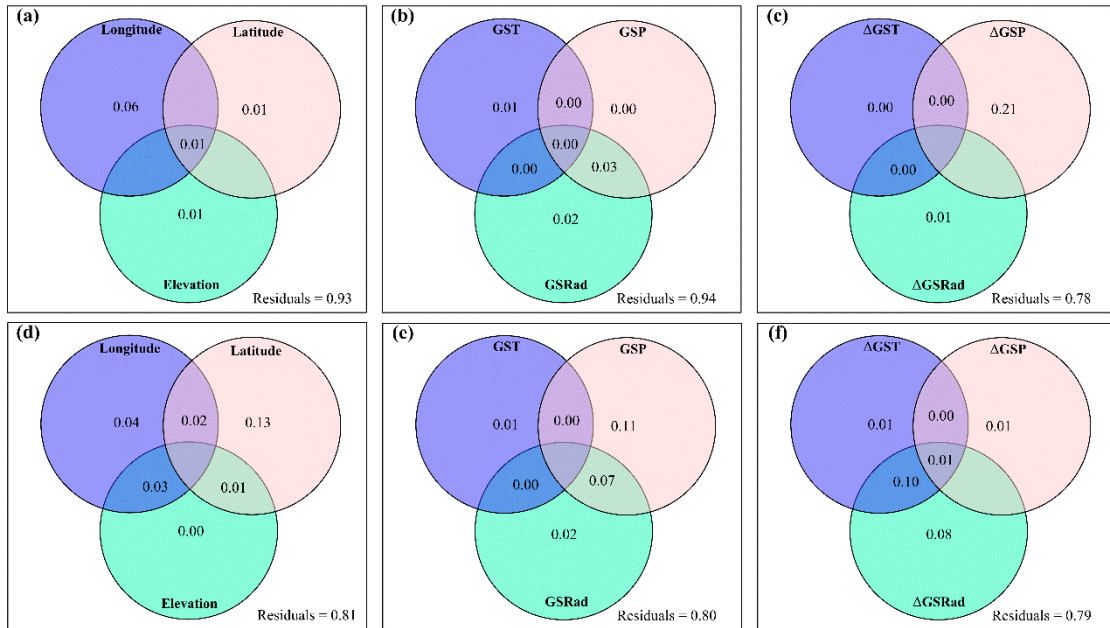

**Figure S8** Relative influences of (a) elevation, latitude and longitude to  $\Delta SM_{a\_0-10}$ , (b) GST, GSP and GSRad to  $\Delta SM_{a\_0-10}$ , (c)  $\Delta GST$ ,  $\Delta GSP$  and  $\Delta GSRad$  to  $\Delta SM_{a\_0-10}$ , (d) elevation, latitude and longitude to  $\Delta SM_{a\_10-20}$ , (e) GST, GSP and GSRad to  $\Delta SM_{a\_10-20}$ , and (f)  $\Delta GST$ ,  $\Delta GSP$  and  $\Delta GSRad$  to  $\Delta SM_{a\_10-20}$ .

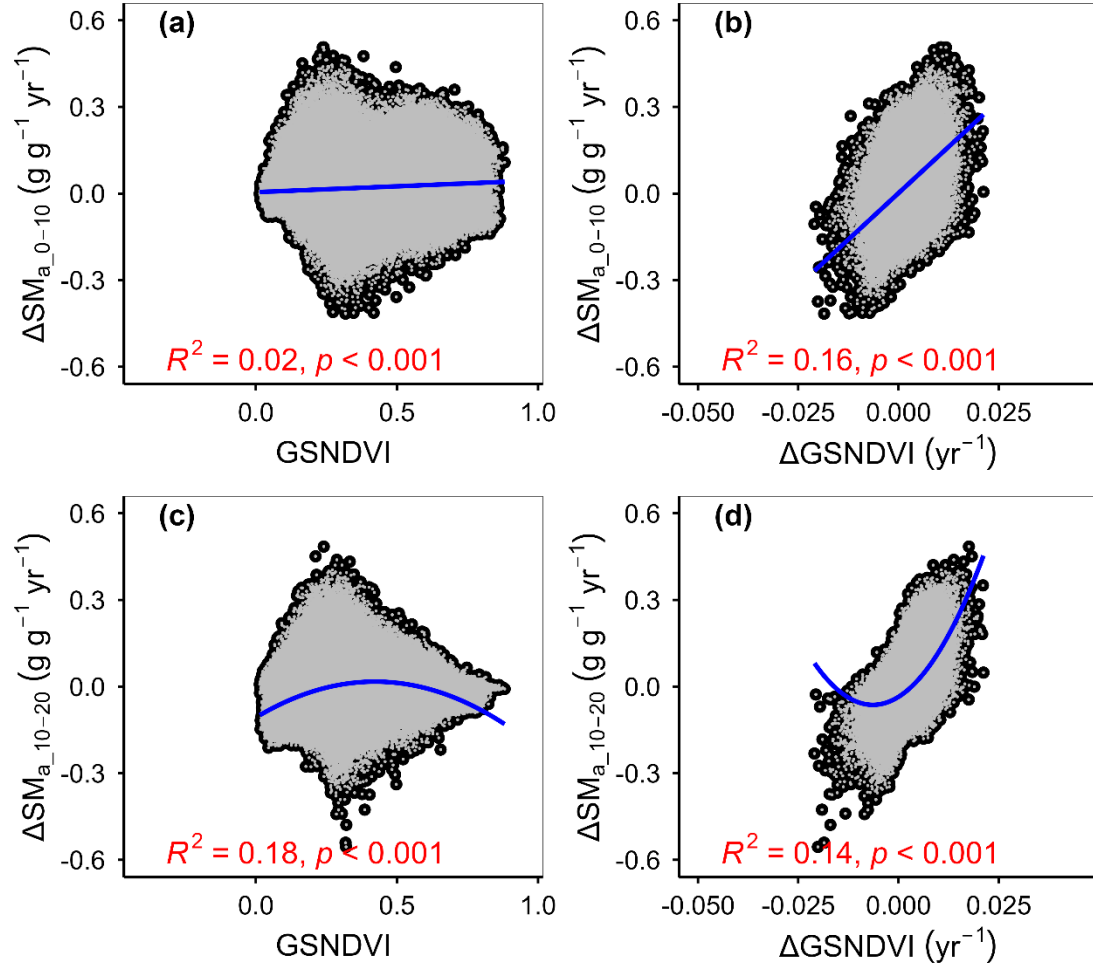

**Figure S9** Relationships between (a)  $\Delta SM_{a_0-10}$  and  $GSNDVI$ , (b)  $\Delta SM_{a_0-10}$  and  $\Delta GSNDVI$ , (c)  $\Delta SM_{a_{10-20}}$  and  $GSNDVI$ , and (d)  $\Delta SM_{a_{10-20}}$  and  $\Delta GSNDVI$ .



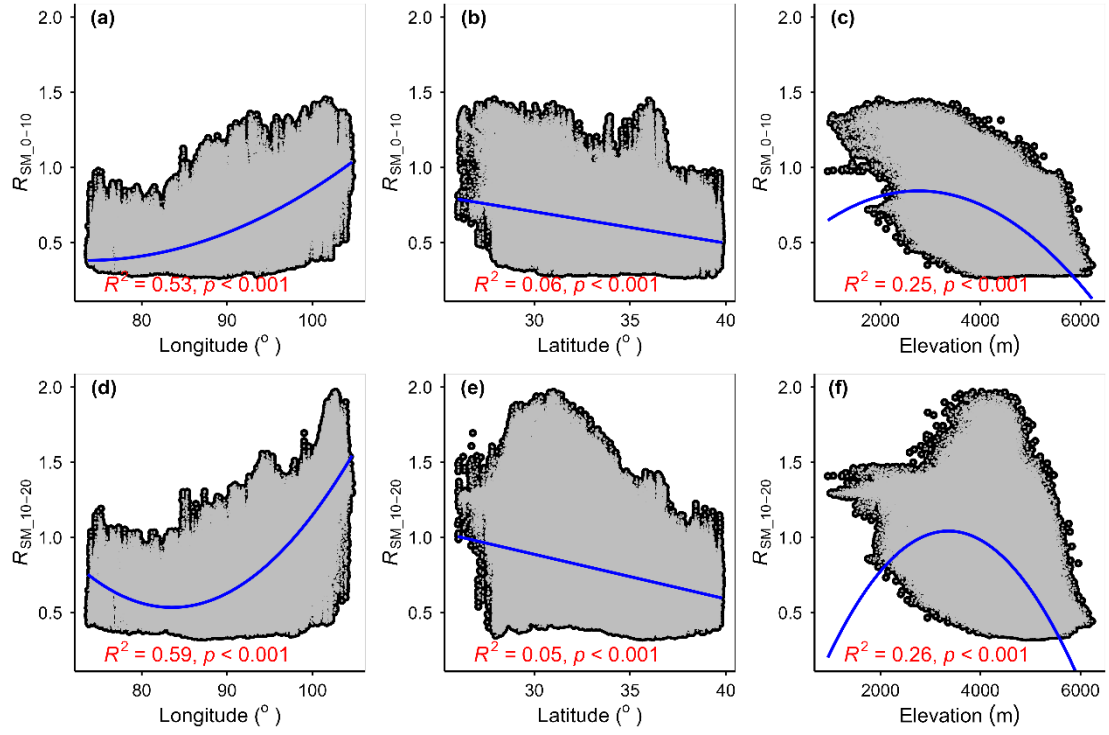

**Figure S10** Relationships between (a)  $R_{SM\_0-10}$  and longitude, (b)  $R_{SM\_0-10}$  and latitude, (c)  $R_{SM\_0-10}$  and elevation, (d)  $R_{SM\_10-20}$  and longitude, (e)  $R_{SM\_10-20}$  and latitude, and (f)  $R_{SM\_10-20}$  and elevation.

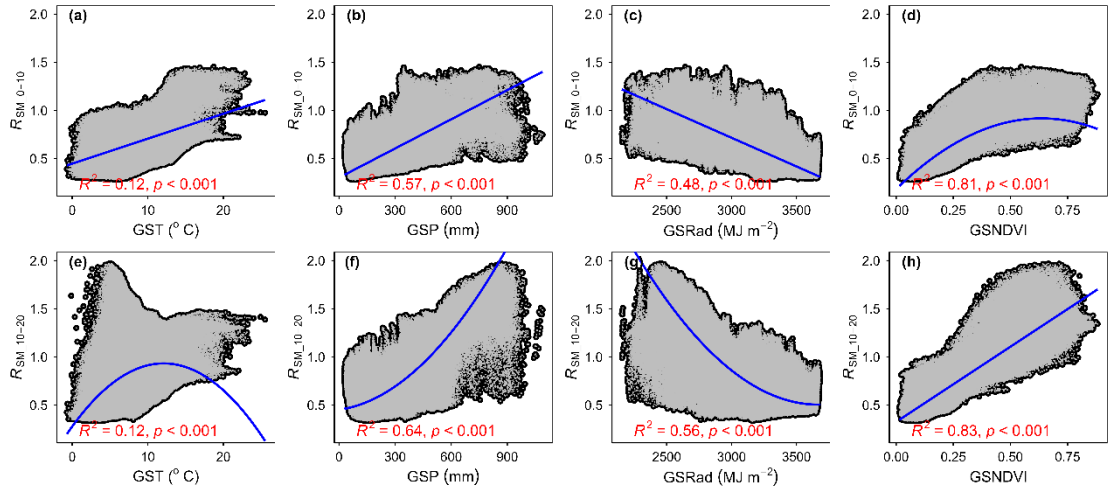

**Figure S11** Relationships between (a)  $R_{SM\_0-10}$  and GST, (b)  $R_{SM\_0-10}$  and GSP, (c)  $R_{SM\_0-10}$  and GSRad, (d)  $R_{SM\_0-10}$  and GSNDVI, (e)  $R_{SM\_10-20}$  and GST, (f)  $R_{SM\_10-20}$  and GSP, (g)  $R_{SM\_10-20}$  and GSRad, and (h)  $R_{SM\_10-20}$  and GSNDVI.

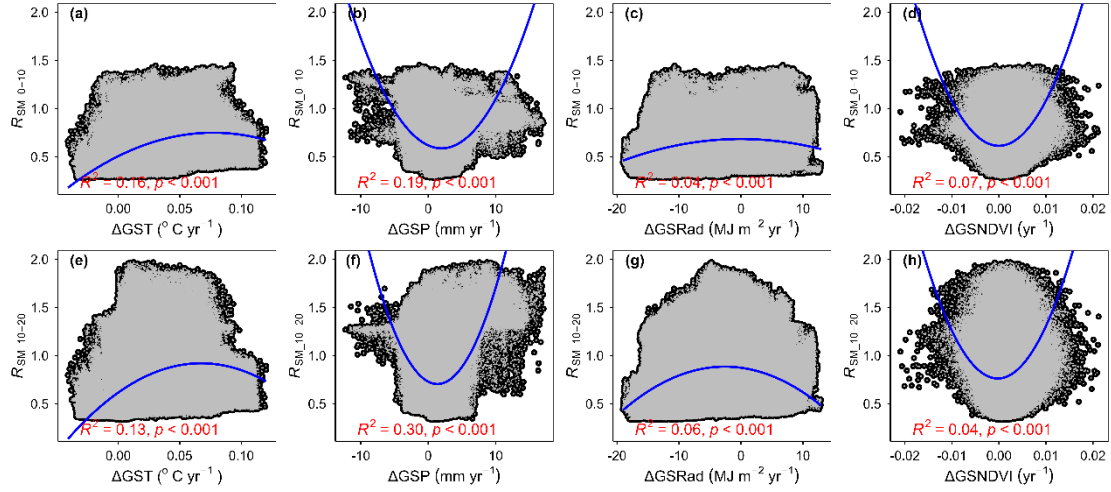

**Figure S12** Relationships between (a)  $R_{SM\_0-10}$  and  $\Delta GST$ , (b)  $R_{SM\_0-10}$  and  $\Delta GSP$ , (c)  $R_{SM\_0-10}$  and  $\Delta GSRad$ , (d)  $R_{SM\_0-10}$  and  $\Delta GSNDVI$ , (e)  $R_{SM\_10-20}$  and  $\Delta GST$ , (f)  $R_{SM\_10-20}$  and  $\Delta GSP$ , (g)  $R_{SM\_10-20}$  and  $\Delta GSRad$ , and (h)  $R_{SM\_10-20}$  and  $\Delta GSNDVI$ .

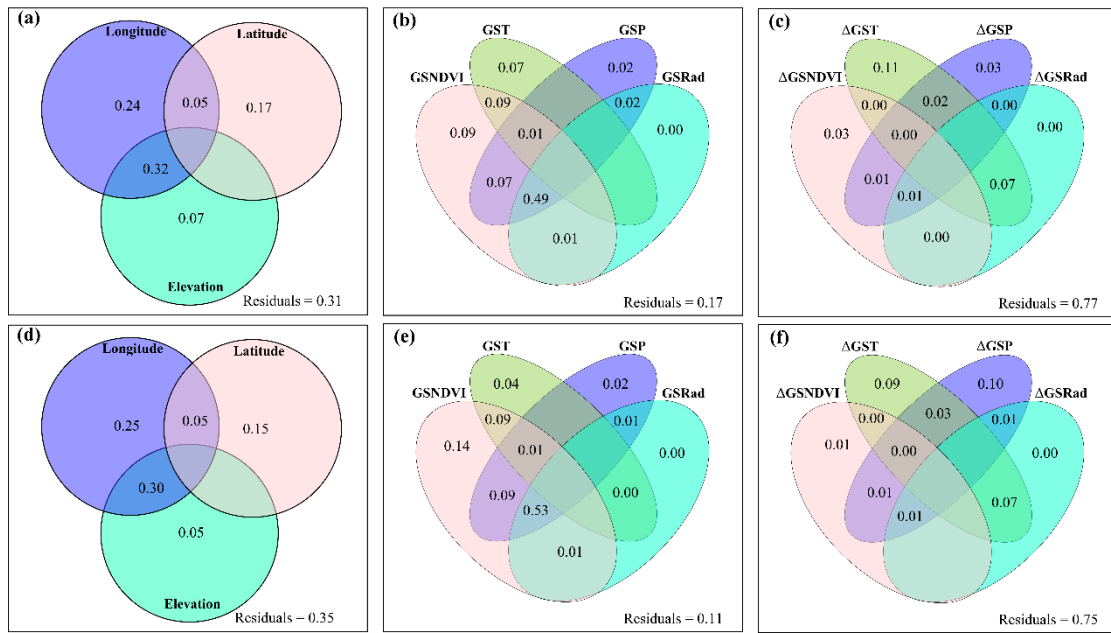

**Figure S13** Relative influences of (a) elevation, latitude and longitude to  $R_{SM\_0-10}$ , (b) GSNDVI, GST, GSP and GSRad to  $R_{SM\_0-10}$ , (c)  $\Delta GSNDVI$ ,  $\Delta GST$ ,  $\Delta GSP$  and  $\Delta GSRad$  to  $R_{SM\_0-10}$ , (d) elevation, latitude and longitude to  $R_{SM\_10-20}$ , (e) GSNDVI, GST, GSP and GSRad to  $R_{SM\_10-20}$ , and (f)  $\Delta GSNDVI$ ,  $\Delta GST$ ,  $\Delta GSP$  and  $\Delta GSRad$  to  $R_{SM\_10-20}$ .

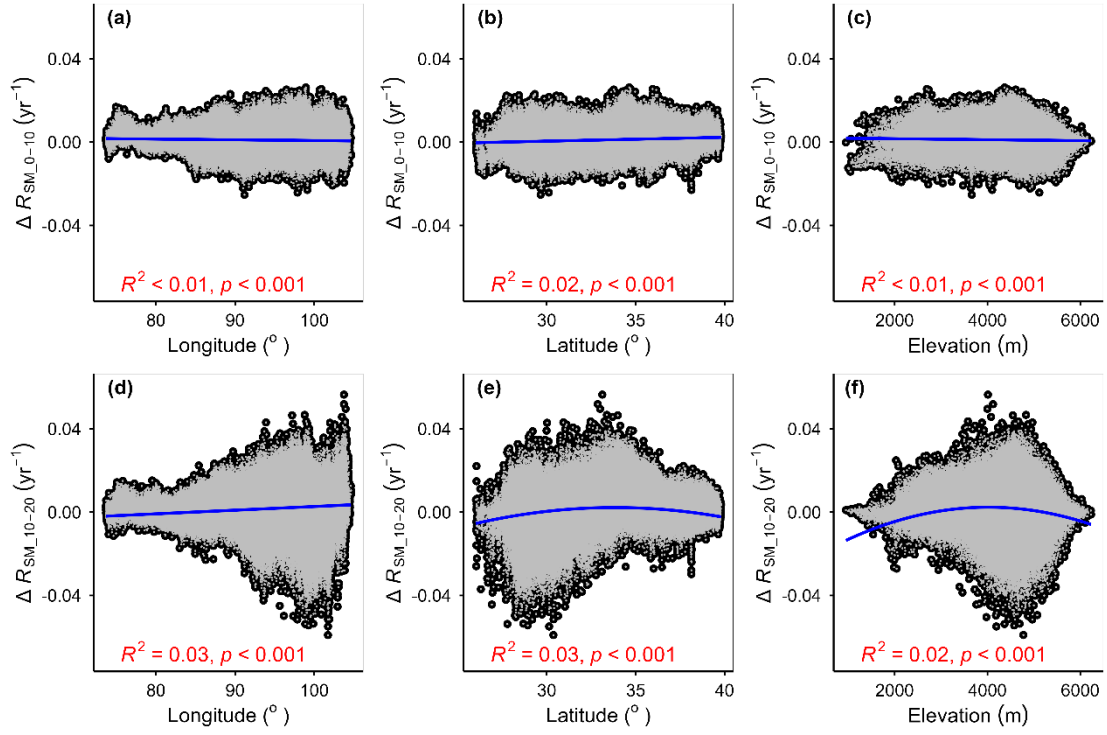

**Figure S14** Relationships between (a)  $\Delta R_{SM_{0-10}}$  and longitude, (b)  $\Delta R_{SM_{0-10}}$  and latitude, (c)  $\Delta R_{SM_{0-10}}$  and elevation, (d)  $\Delta R_{SM_{10-20}}$  and longitude, (e)  $\Delta R_{SM_{10-20}}$  and latitude, and (f)  $\Delta R_{SM_{10-20}}$  and elevation.

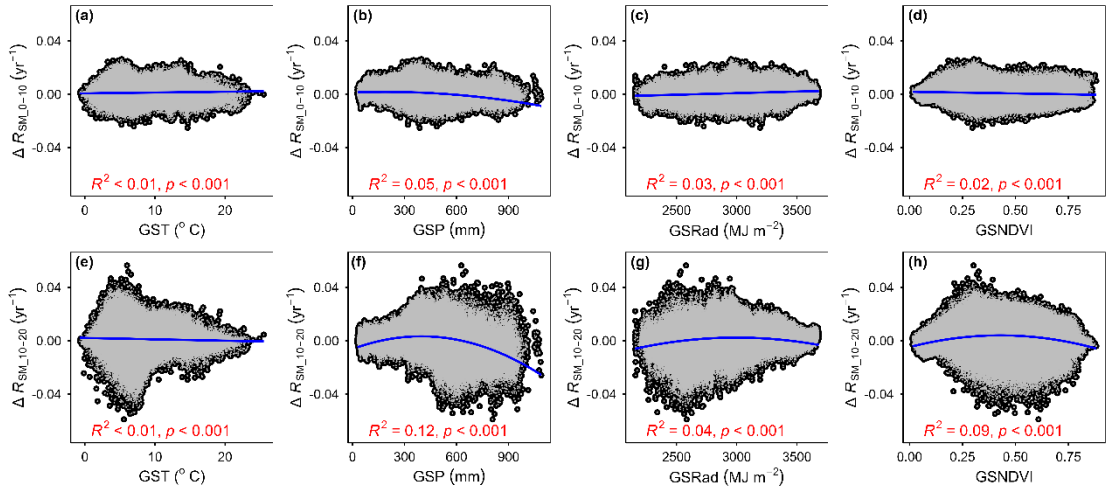

**Figure S15** Relationships between (a)  $\Delta R_{SM_{0-10}}$  and GST, (b)  $\Delta R_{SM_{0-10}}$  and GSP, (c)  $\Delta R_{SM_{0-10}}$  and GSRad, (d)  $\Delta R_{SM_{0-10}}$  and GSNDVI, (e)  $\Delta R_{SM_{10-20}}$  and GST, (f)  $\Delta R_{SM_{10-20}}$  and GSP, (g)  $\Delta R_{SM_{10-20}}$  and GSRad, and (h)  $\Delta R_{SM_{10-20}}$  and GSNDVI.

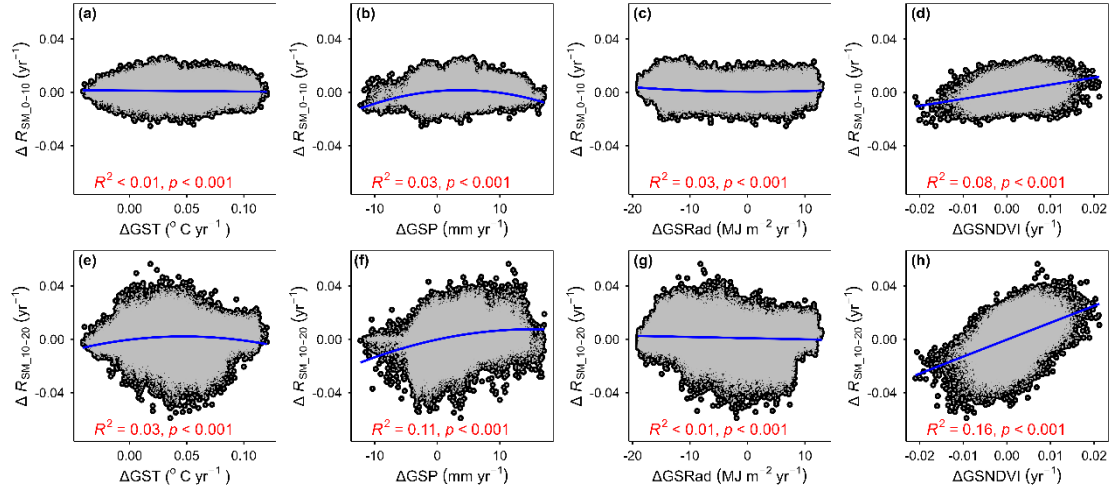

**Figure S16** Relationships between (a)  $\Delta R_{SM_{0-10}}$  and  $\Delta GST$ , (b)  $\Delta R_{SM_{0-10}}$  and  $\Delta GSP$ , (c)  $\Delta R_{SM_{0-10}}$  and  $\Delta GSRad$ , (d)  $\Delta R_{SM_{0-10}}$  and  $\Delta GSNDVI$ , (e)  $\Delta R_{SM_{10-20}}$  and  $\Delta GST$ , (f)  $\Delta R_{SM_{10-20}}$  and  $\Delta GSP$ , (g)  $\Delta R_{SM_{10-20}}$  and  $\Delta GSRad$ , and (h)  $\Delta R_{SM_{10-20}}$  and  $\Delta GSNDVI$ .

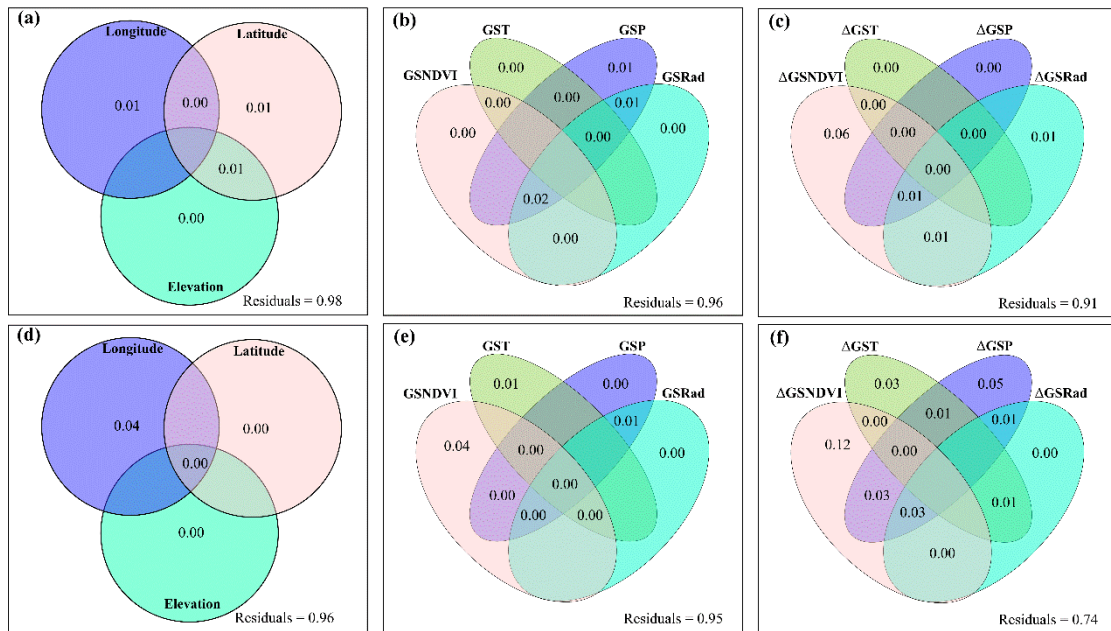

**Figure S17** Relative influences of (a) elevation, latitude and longitude to  $\Delta R_{SM_{0-10}}$ , (b) GSNDVI, GST, GSP and GSRad to  $\Delta R_{SM_{0-10}}$ , (c)  $\Delta GSNDVI$ ,  $\Delta GST$ ,  $\Delta GSP$  and  $\Delta GSRad$  to  $\Delta R_{SM_{0-10}}$ , (d) elevation, latitude and longitude to  $\Delta R_{SM_{10-20}}$ , (e) GSNDVI, GST, GSP and GSRad to  $\Delta R_{SM_{10-20}}$ , and (f)  $\Delta GSNDVI$ ,  $\Delta GST$ ,  $\Delta GSP$  and  $\Delta GSRad$  to  $\Delta R_{SM_{10-20}}$ .
